# Supplementary material
Source: MDPI journal article supplement (https://www.mdpi.com/2073-445X/11/2/274)
Supplement: s1 [file s1 › land-1489219-supplementary.pdf]

## Results – baseline monitoring

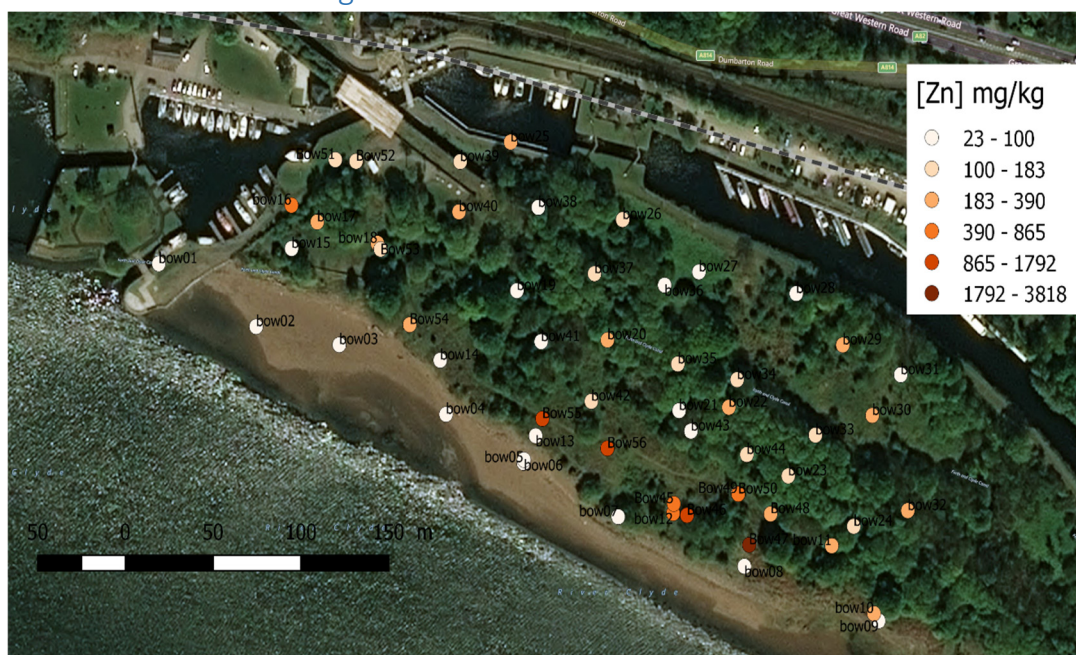

Figure S1: Bowling site Zn by pXRF in soil

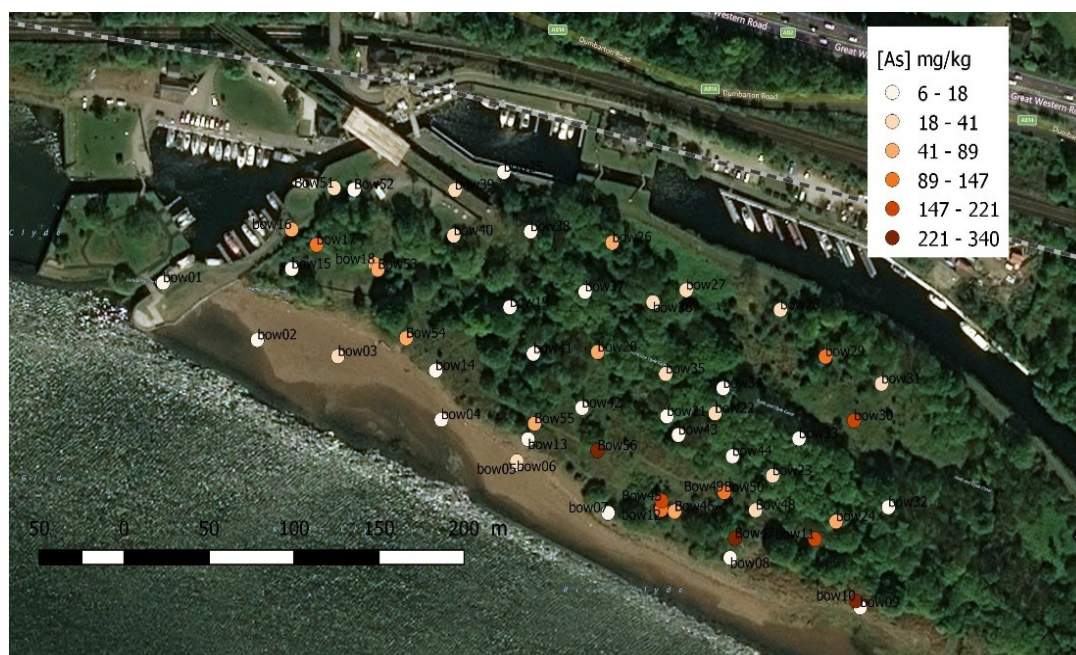

Figure S2: Bowling site As by pXRF in soil

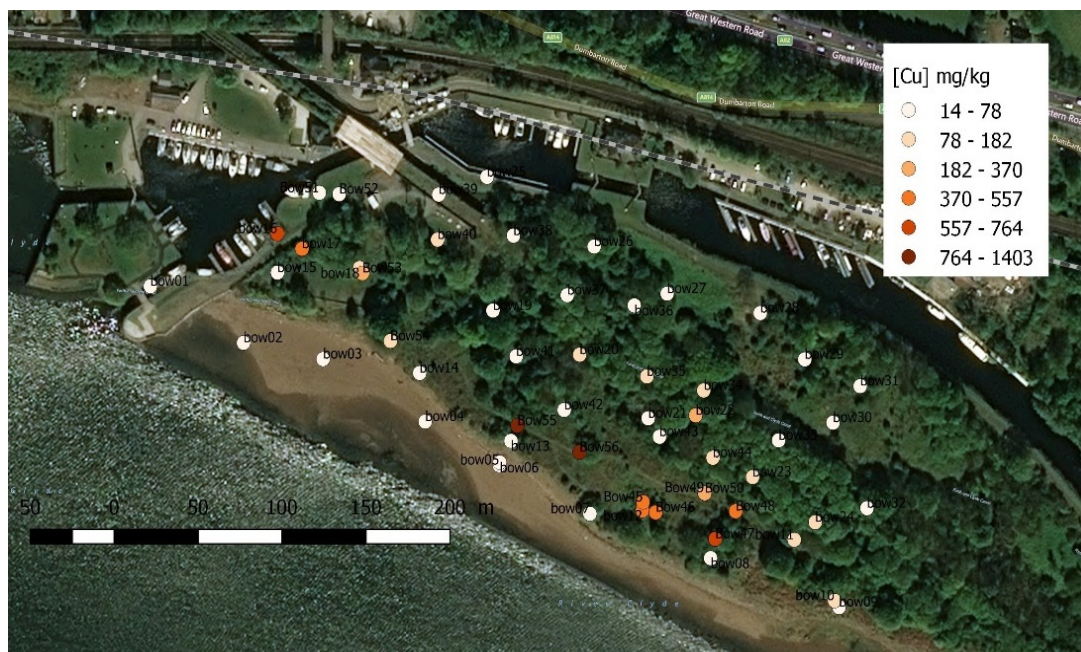

Figure S3: Bowling site Cu by pXRF in soil
